# Supplementary material for: Delivery of a system xc−inhibitor by a redox-responsive levodopa prodrug nanoassembly for combination ferrotherapy
Source: Royal Society of Chemistry journal article supplement (doi:10.1039/d1tb00742d), 2021-01-01
Supplement: d1tb00742d1.pdf [file d1tb00742d1.pdf]

## Supporting Information

### **Delivery of system $x_c^-$ inhibitor by a redox-responsive levodopa prodrug nanoassembly for combination ferrotherapy**

Huhu Xin,<sup>‡a</sup> Yong Huang,<sup>‡ab</sup> Honglin Tang,<sup>a</sup> Yuan Chen,<sup>a</sup> Hongguang Xia,<sup>\*bc</sup> Fu Zhang,<sup>c</sup> Bowen Li,<sup>\*a</sup> and Yuan Ping<sup>\*abc</sup>

<sup>a</sup> College of Pharmaceutical Sciences, Zhejiang University, Hangzhou 310058, China

<sup>b</sup> Liangzhu Laboratory, Zhejiang University Medical Center, 1369 West Wenyi Road, Hangzhou 311121, China

<sup>c</sup> Department of Biochemistry & Research Center of Clinical Pharmacy of The First Affiliated Hospital, Zhejiang University School of Medicine, Hangzhou 310058, China.

\* Corresponding author: E-mail: hongguangxia@zju.edu.cn (H. G. Xia); bowen\_li@zju.edu.cn (B. W. Li); pingy@zju.edu.cn (Y. Ping).

<sup>‡</sup> The authors contributed equally to this work.

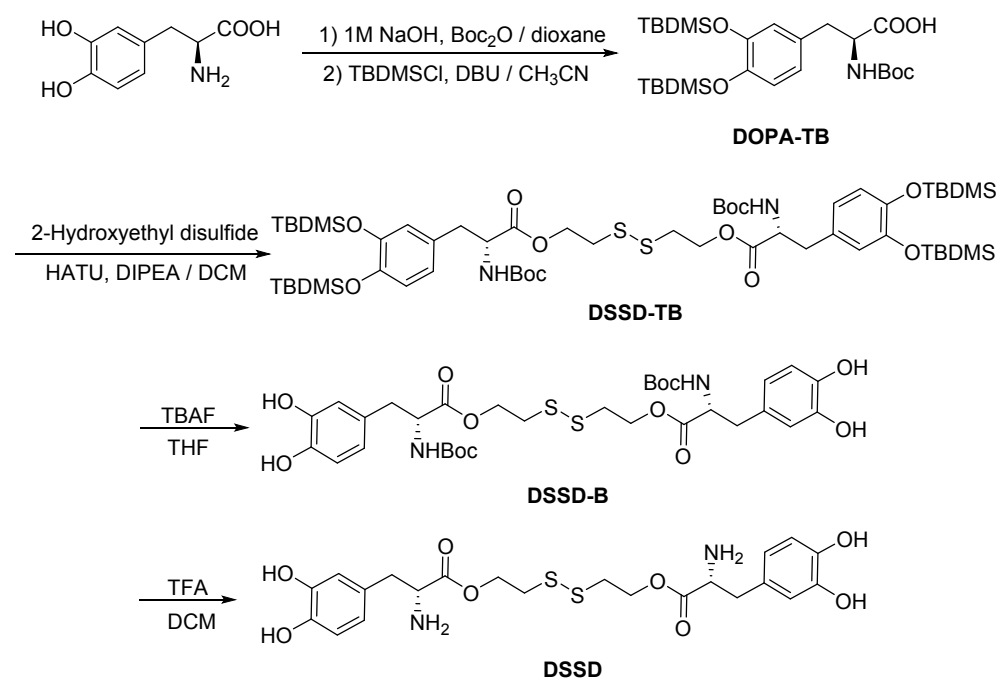

**Scheme S1.** The synthesis route of **DSSD**.

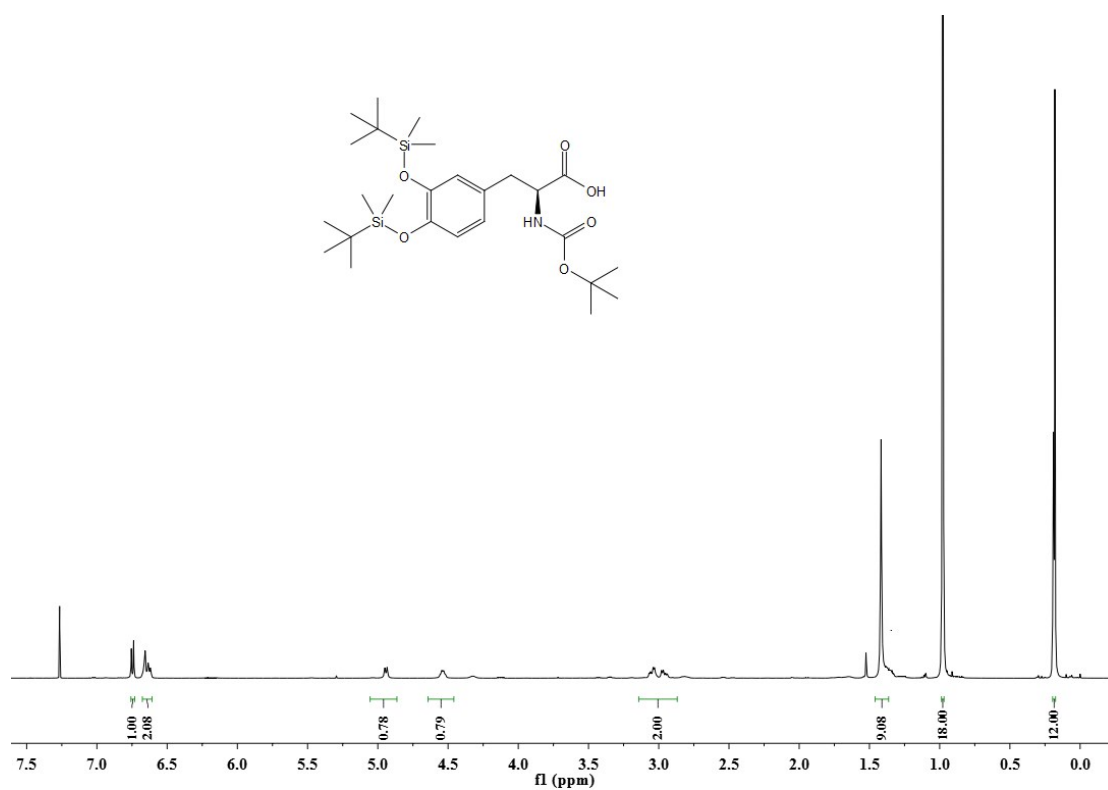

**Fig. S1** <sup>1</sup>H-NMR spectrum of compound **DOPA-TB** (in CDCl<sub>3</sub>).

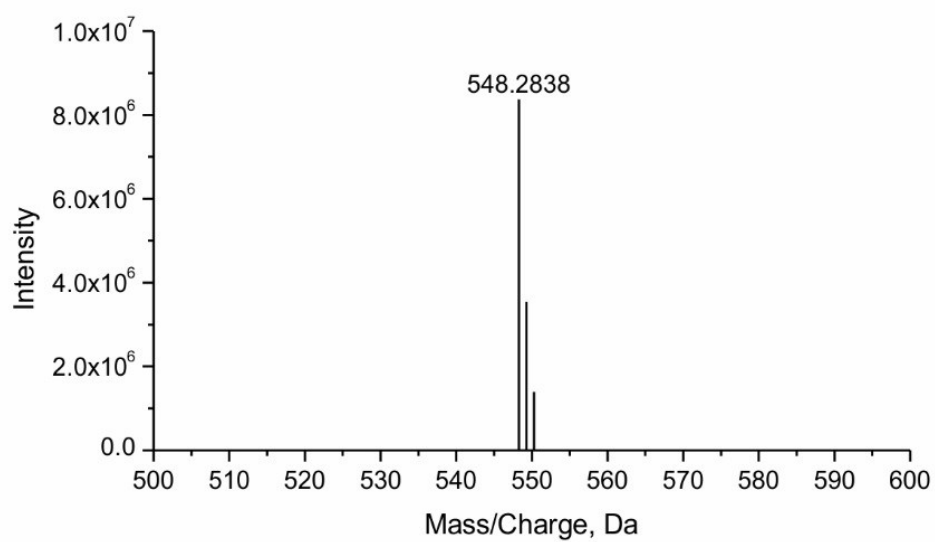

**Fig. S2** HR-MS of compound **DOPA-TB**.

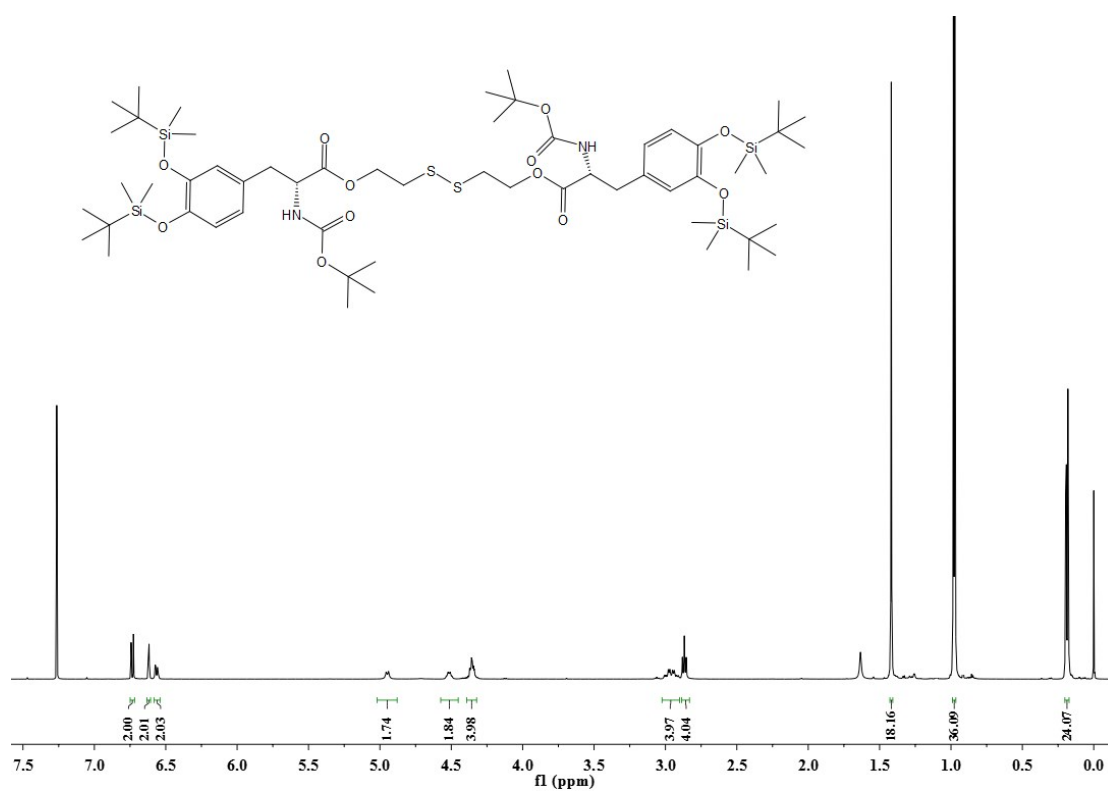

**Fig. S3**  $^1\text{H}$ -NMR spectrum of compound **DSSD-TB** (in  $\text{CDCl}_3$ ).

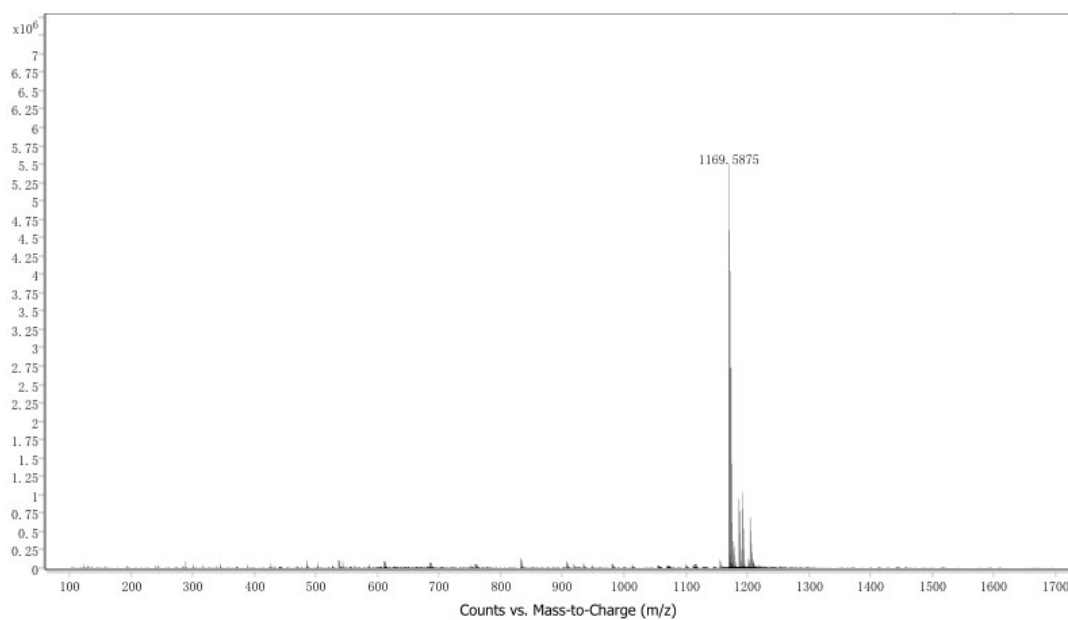

**Fig. S4** HR-MS of compound **DSSD-TB**.

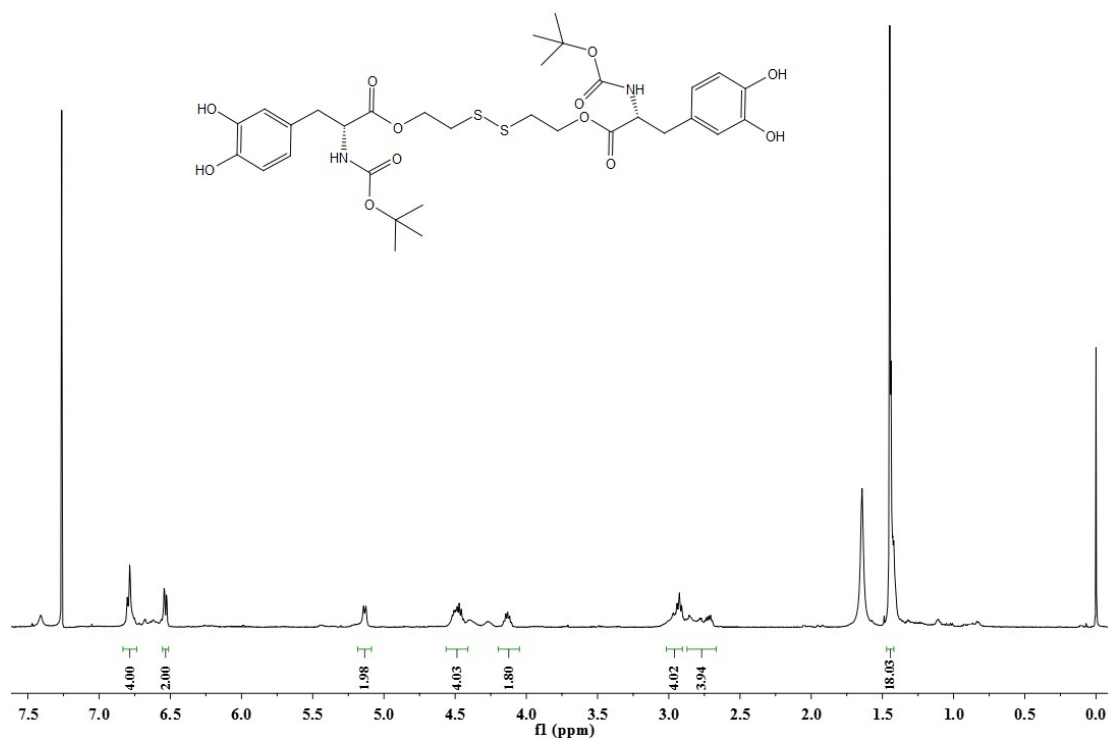

**Fig. S5**  $^1\text{H}$ -NMR spectrum of compound **DSSD-B** (in  $\text{CDCl}_3$ ).

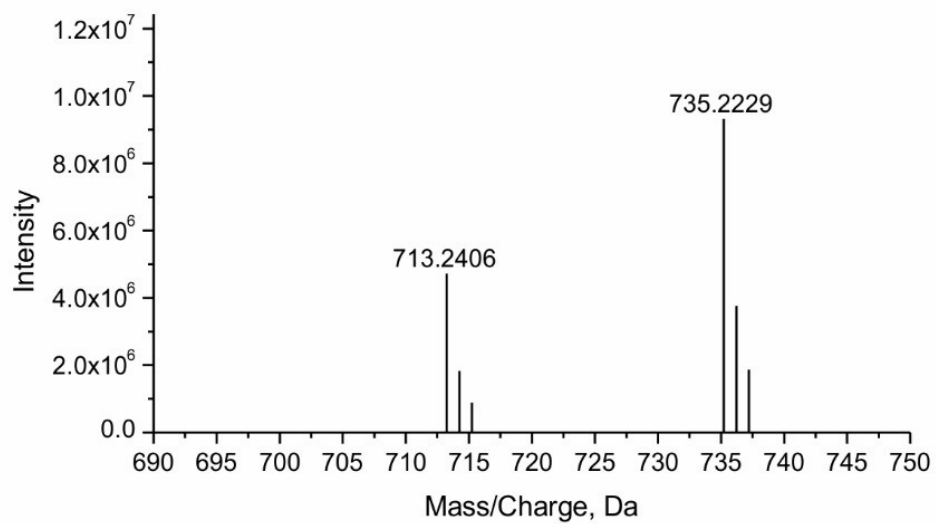

**Fig. S6** HR-MS of compound **DSSD-B**.

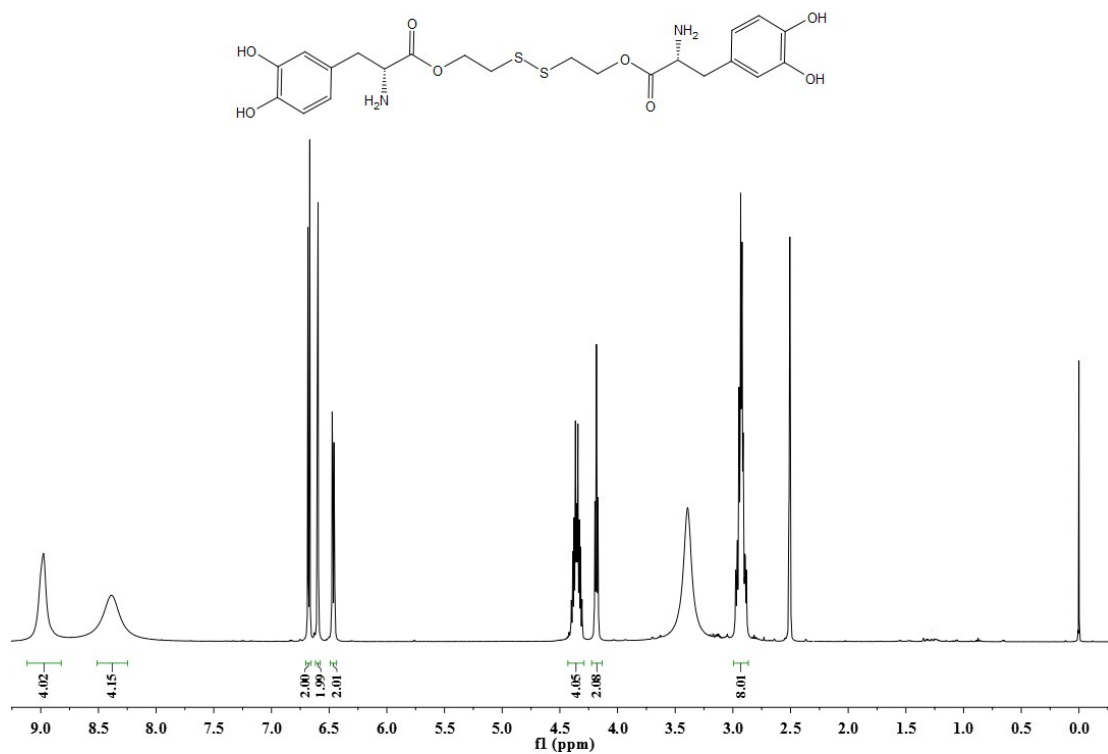

**Fig. S7**  $^1\text{H}$ -NMR spectrum of compound **DSSD** (in  $\text{DMSO-d}_6$ ).

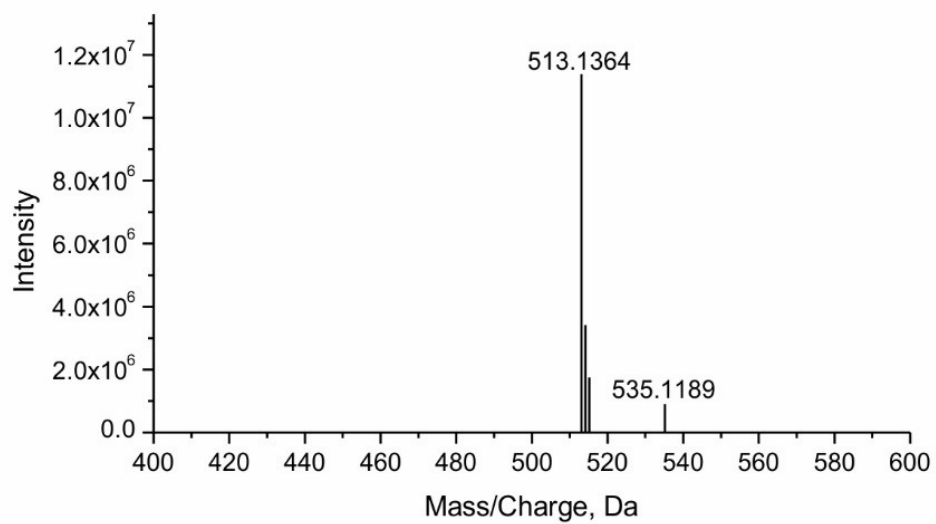

**Fig. S8** HR-MS of compound **DSSD**.

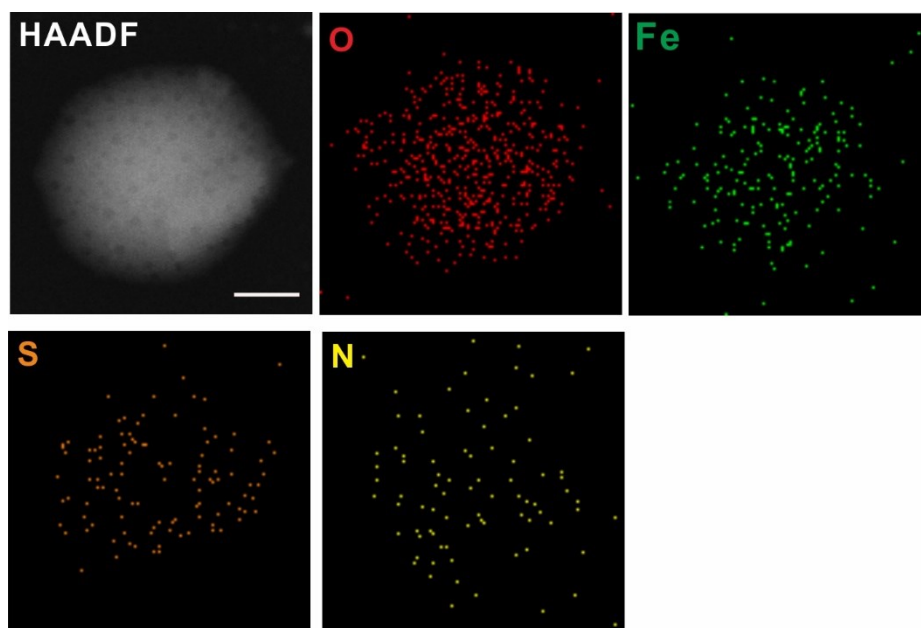

**Fig. S9** HAADF-STEM and EDS mapping of SSZ-Fe<sup>2+</sup>@DSS (Scale bar: 50 nm).

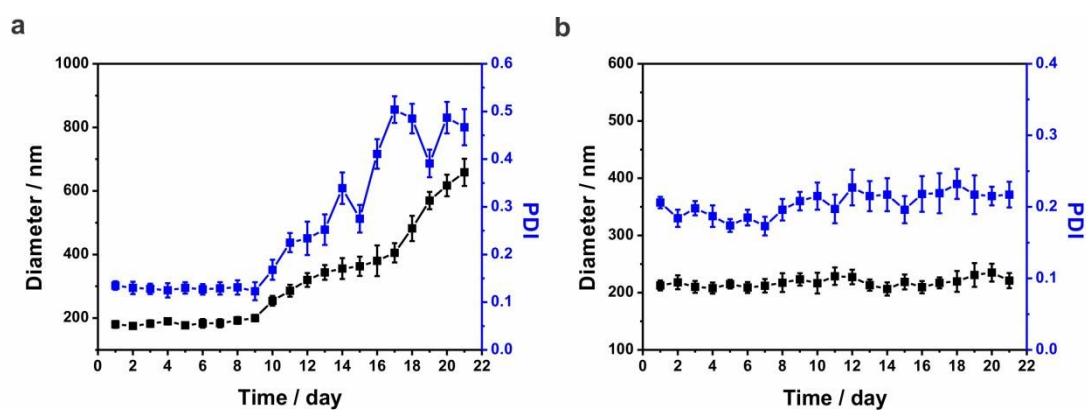

**Fig. S10** Diameters for (a)SSZ@DSSD and (b)SSZ-Fe<sup>2+</sup>@DSSD (0.5 mg mL<sup>-1</sup>) in pH 7.4 PBS buffer at 37 °C as determined by DLS for 21 days.

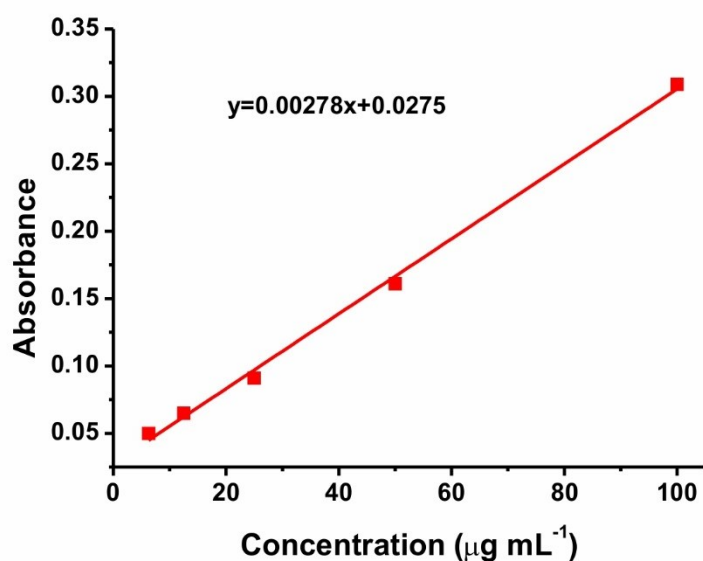

**Fig. S11** Calibration curves for DSSD measured by absorption spectrometry.  $\lambda_{\text{abs}} = 361 \text{ nm}$ .

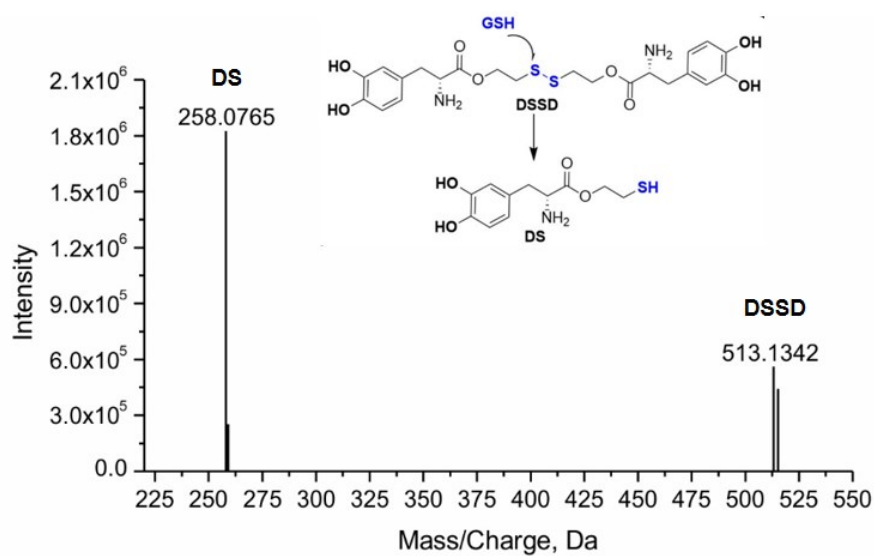

**Fig. S12** High-resolution mass spectrum of the DSSD ( $50 \mu\text{g mL}^{-1}$ ) treated with GSH (10 mM) for 20 min. The signals at  $m/z$  258.0765 and 513.1342 represent DS and DSSD, respectively.



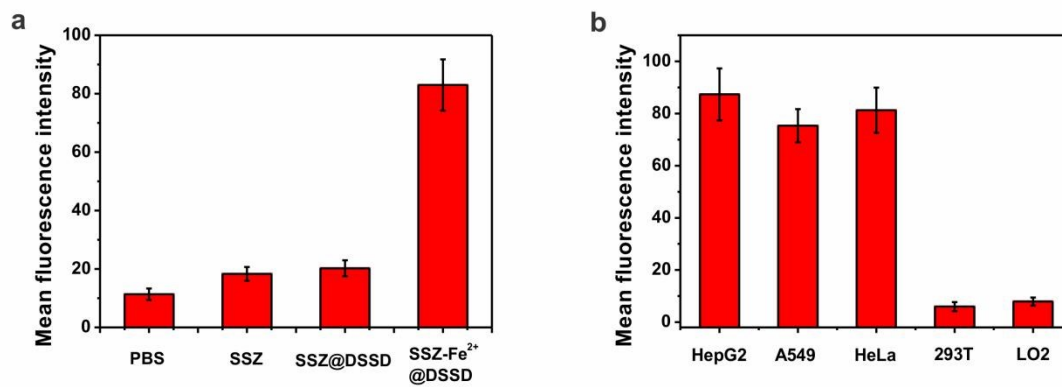

**Fig. S13** Quantitative analysis of the fluorescence intensity of (a)Fig. 2d and (b)2e.

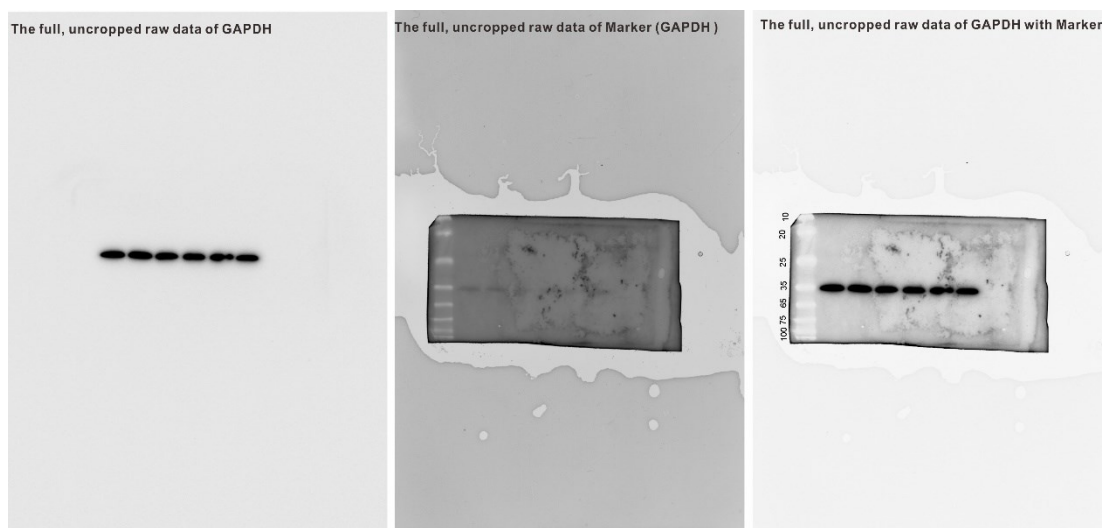

**Fig. S14** The full, uncropped raw data of GAPDH with markers.

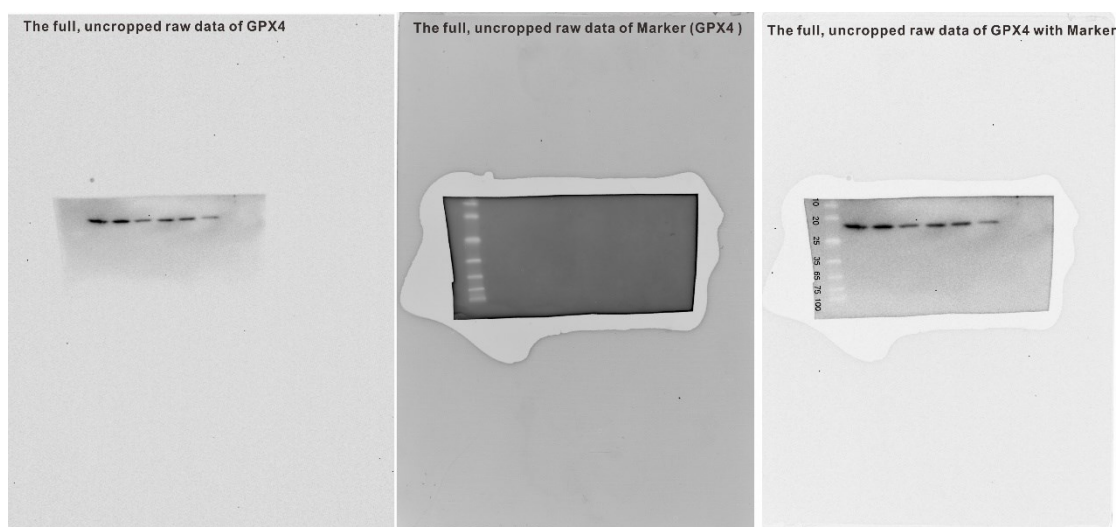

**Fig. S15** The full, uncropped raw data of GPX4 with markers.

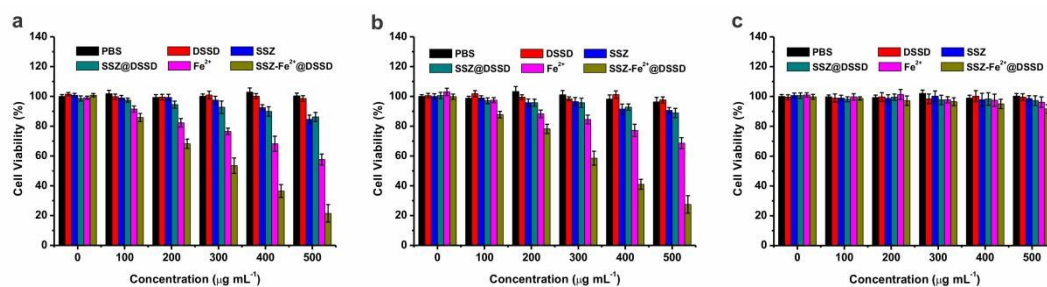

**Fig. S16** The viability of (a)HepG2, (b)A549 and (c)LO2 cells after incubation with different formulations at various concentrations (0, 100, 200, 300, 400 and 500 µg mL<sup>-1</sup>, respectively).

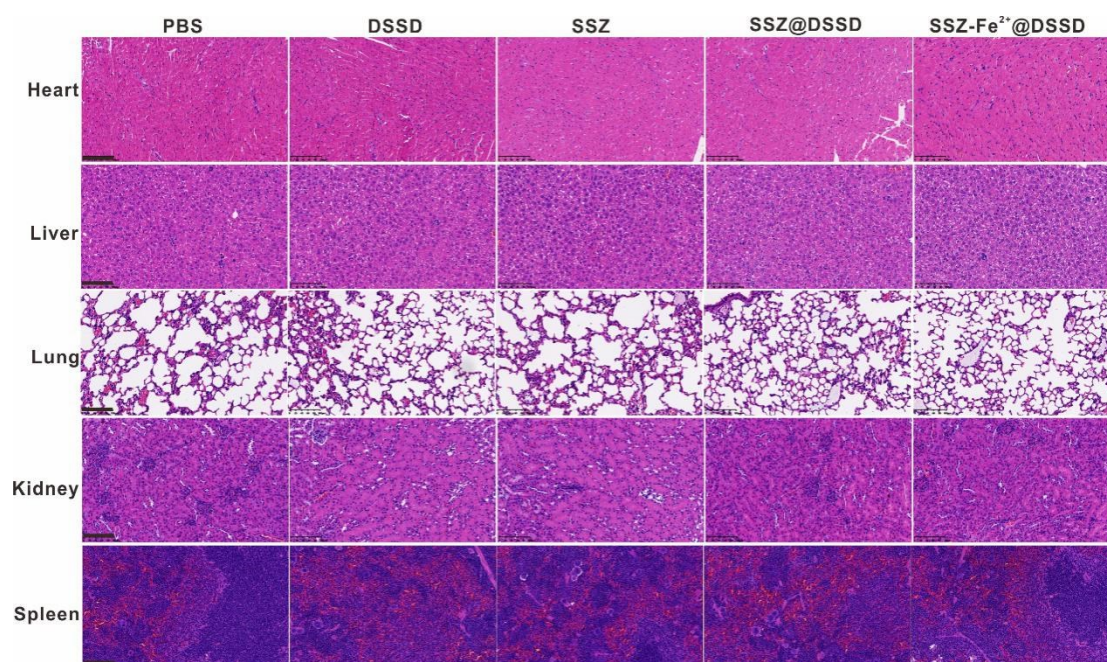

**Fig. S17** H&E staining results of the major organs (heart, liver, spleen, lung and kidney) with different formulations. The scar bar: 100 µm.
